# Supplementary material
Source: PubMed Central journal article supplement (PMC8986166)
Supplement: mmc1.pdf [file mmc1.pdf]

# THE LANCET

## Infectious Diseases

### Supplementary appendix

This appendix formed part of the original submission. We post it as supplied by the authors.

Supplement to: Romero-Olmedo AJ, Schulz AR, Hochstätter S, et al. Dynamics of humoral and T-cell immunity after three BNT162b2 vaccinations in adults older than 80 years. *Lancet Infect Dis* 2022; published online April 6. [https://doi.org/10.1016/S1473-3099\(22\)00219-5](https://doi.org/10.1016/S1473-3099(22)00219-5).

1 **Supplementary appendix related to the correspondence**

2  
3 **Divergent dynamics of humoral and T cell immunity after two and three BNT162b2**  
4 **vaccinations in adults aged >80 years**

5  
6 Addi J. Romero-Olmedo PhD<sup>1#</sup>, Axel Ronald Schulz PhD<sup>2#</sup>, Svenja Hochstätter<sup>3</sup>, Dennis Das  
7 Gupta MD<sup>1</sup>, Heike Hirseland<sup>2</sup>, Daniel Staudenraus MSc<sup>1</sup>, Bärbel Camara<sup>1</sup>, Kirsten Volland<sup>3</sup>,  
8 Véronique Hefter<sup>3</sup>, Siddhesh Sapre MSc<sup>3</sup>, Verena Krähling PhD<sup>3,4</sup>, Helena Müller-Kräuter  
9 PhD<sup>3,4</sup>, Ho-Ryun Chung PhD<sup>5</sup>, Henrik E. Mei PhD<sup>2\*</sup>, Christian Keller MD<sup>3\*</sup>, Michael Lohoff  
10 MD<sup>1\*</sup>

11  
12 <sup>1</sup> Institute of Medical Microbiology and Hospital Hygiene, Philipps-University Marburg,  
13 Marburg, Germany

14 <sup>2</sup> Deutsches Rheumaforschungszentrum Berlin, a Leibniz Institute, Berlin, Germany

15 <sup>3</sup> Institute of Virology, Philipps-University, Marburg, Germany

16 <sup>4</sup> German Center for Infection Research (DZIF), partner site Gießen – Marburg – Langen,  
17 Marburg, Germany

18 <sup>5</sup> Institute of Medical Bioinformatics and Biostatistics, Philipps-University Marburg,  
19 Bunsenstrasse 3, Marburg, Germany.

20  
21 # Addi J. Romero-Olmedo and Axel Ronald Schulz contributed equally to this work.

22 \* Henrik E. Mei, Christian Keller and Michael Lohoff contributed equally as senior authors.

23  
24 Contact: Michael Lohoff, M.D., Ph.D., Inst. of med. Microbiology and Hospital Hygiene, PU  
25 Marburg, Germany, e-mail: lohoff@med.uni-marburg.de

26 Supported in part by grants of the Government of Hesse (Pandemie Netzwerk), Germany, by  
27 the Else-Kroener-Fresenius-Stiftung, Germany, the Senate of Berlin, by the Deutsche  
28 Forschungsgemeinschaft (DFG), grant LO 396/8-1 to ML, and by the German Center for  
29 Infection Research (DZIF), Section Emergency Vaccines, FKZ: 8033801809 to VK.

31 The funders had no role in the design or conduct of the study; collection, management,  
32 analysis, and interpretation of the data; the preparation, review, or approval of the  
33 manuscript; or the decision to submit the manuscript for publication.

34

#### 35 **Authors' contributions**

36 AJRO and ARS organized and performed experiments, analyzed data, and created the  
37 figures. CK and SH provided data for the figures. DDG, SH, and VH collected blood. HH  
38 and ARS performed flow cytometry analysis. AJRO, DS, BC, SH, prepared cells. SH, CM,  
39 SS were involved in antibody analyses. HRC performed statistical analysis. VK, HMK, and  
40 KV performed serological assays. HEM, CK, and ML design the study, recruited the study  
41 population. HEM, CK, AJRO, ARS, DDG, and ML critically discussed the data. ML wrote  
42 the manuscript. HEM, CK, AJRO, and ARS revised the manuscript.

#### 43 **Ethics committee approval and patient consent**

44 The study of patients with COVID-19 and vaccinations against COVID-19 was approved by  
45 the ethics committee of the medical faculty of the Philipps-University Marburg (study  
46 number 40/21-12032021). All donors provided informed consent to participate in the study.

47

48 **Table S1. Summary of vaccinated donors' characteristics**

| Group  | Total donors | Sex                                | Age range   | Age mean / SD |
|--------|--------------|------------------------------------|-------------|---------------|
| W0, W3 | n=52         | female: 31 (60%)<br>male: 21 (40%) | 80–97 years | 84.0 / 3.7    |
| W5     | n=49         | female: 30 (61%)<br>male: 19 (39%) | 80–97 years | 84.0 / 3.7    |
| W24    | n=37         | female: 23 (62%)<br>male: 14 (38%) | 80–97 years | 83.4 / 3.7    |
| W26    | n=34         | female: 22 (65%)<br>male: 12 (35%) | 80–97 years | 83.4 / 3.6    |
| W40    | n=15         | female: 11 (73%)<br>male: 4 (27%)  | 80–97 years | 84.7 / 4.6    |

49

50 **Table S2. Baseline characteristics of vaccinated participants**

| DoNor ID | Age (years) | Sex | Exclusion (reason)    | Smoking      | Chronic lung disease   | Diabetes | Charlson Comorbidity Index (CCI) |
|----------|-------------|-----|-----------------------|--------------|------------------------|----------|----------------------------------|
| 1        | 81          | m   |                       | No           | No                     | No       | 4                                |
| 2        | 86          | m   |                       | No           | No                     | No       | 4                                |
| 3        | 81          | f   |                       | No           | No                     | No       | 4                                |
| 4        | 84          | m   |                       | No           | No                     | No       | 4                                |
| 5        | 81          | m   |                       | No           | No                     | No       | 6                                |
| 6        | 83          | f   |                       | No           | No                     | No       | 4                                |
| 7        | 83          | m   |                       | No           | No                     | Yes      | 7                                |
| 8        | 87          | f   |                       | No           | Chronic asthma         | Yes      | 5                                |
| 9        | 83          | f   |                       | No           | No                     | Yes      | 5                                |
| 10       | 81          | m   |                       | Ceased, 10py | No                     | No       | 4                                |
| 11       | 86          | f   |                       | No           | No                     | No       | 5                                |
| 12       | 82          | f   |                       | No           | No                     | No       | 7                                |
| 13       | 82          | m   |                       | Ceased, 20py | No                     | No       | 6                                |
| 14       | 82          | f   |                       | Ceased       | COPD, bronchial asthma | No       | 4                                |
| 15       | 84          | f   |                       | No           | No                     | Yes      | 4                                |
| 16       | 82          | m   |                       | No           | No                     | No       | 6                                |
| 17       | 95          | m   |                       | No           | No                     | No       | 4                                |
| 18       | 85          | f   |                       | No           | No                     | Yes      | 5                                |
| 19       | 85          | f   |                       | No           | No                     | No       | 4                                |
| 20       | 81          | f   |                       | No           | Spastic bronchitis     | No       | 5                                |
| 21       | 86          | f   |                       | No           | No                     | No       | 4                                |
| 22       | 82          | m   |                       | No           | No                     | No       | 5                                |
| 23       | 82          | f   |                       | No           | No                     | No       | 4                                |
| 24       | 87          | m   | Death due to accident |              |                        |          |                                  |
| 25       | 81          | f   | Own decision          |              |                        |          |                                  |
| 26       | 80          | m   |                       | Yes          | No                     | No       | 4                                |
| 27       | 86          | m   |                       | No           | Mild bronchitis        | No       | 4                                |
| 28       | 89          | f   |                       | No           | No                     |          | 4                                |
| 29       | 85          | f   |                       | No           | No                     | No       | 5                                |
| 30       | 81          | f   |                       | No           | No                     | No       | 5                                |
| 31       | 82          | m   |                       | No           | COPD                   |          | 9                                |

|    |    |   |                      |                 |     |   |
|----|----|---|----------------------|-----------------|-----|---|
| 32 | 88 | f | No                   | No              | No  | 4 |
| 33 | 86 | f | No                   | COPD            | No  | 5 |
| 34 | 86 | m | Previous<br>COVID-19 |                 |     |   |
| 35 | 83 | f | No                   | Allergic asthma | No  | 4 |
| 36 | 80 | f | No                   | No              | No  | 4 |
| 37 | 91 | f | No                   | No              | No  | 4 |
| 38 | 81 | f | No                   | No              | No  | 4 |
| 39 | 80 | m | Ceased               | COPD            | Yes | 6 |
| 40 | 84 | f | Yes                  | No              | No  | 4 |
| 41 | 97 | f | No                   | No              | No  | 5 |
| 42 | 88 | f | No                   | No              | No  | 4 |
| 43 | 80 | m | No                   | No              | No  | 4 |
| 44 | 86 | m | No                   | Lung fibrosis   | No  | 7 |
| 45 | 87 | f | Own decision         |                 |     |   |
| 46 | 83 | f | No                   | No              | No  | 4 |
| 47 | 83 | f | 40py                 | Dry cough       | No  | 4 |
| 48 | 81 | m | 40py                 | No              | Yes | 5 |
| 49 | 84 | f | No                   | No              | Yes | 5 |
| 50 | 91 | m | No                   | No              | Yes | 6 |
| 51 | 80 | m | Ceased               | No              | Yes | 7 |
| 52 | 89 | f | 10py                 | No              | No  | 4 |
| 53 | 81 | f | No                   | No              | No  | 4 |
| 54 | 83 | m | 30-40py              | No              | No  | 4 |
| 55 | 81 | m | No                   | COPD            | No  | 5 |
| 56 | 82 | f | No                   | No              | No  | 4 |

51

52

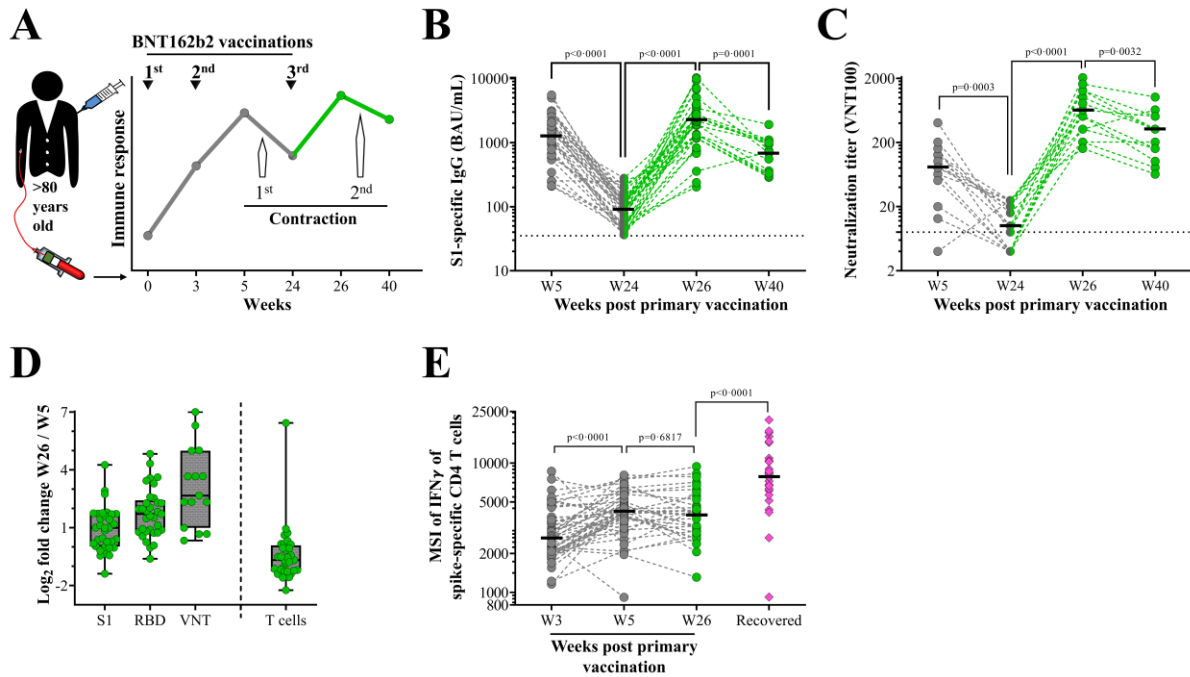

53  
54

55 **Figure S1. Humoral and cellular SARS-CoV-2 immunity in >80 year-old donors after receiving a third**  
56 **dose of the BNT162b2 vaccine.**

57 Study overview (A). Immune response kinetics were followed in older adults (Table S1 and S2) in the course of  
58 vaccinations with BNT162b2. Green color indicates data related to the third dose of BNT162b2. Vaccinations  
59 (black arrow heads) and blood samplings (dots) are indicated. SARS-CoV-2 spike (S1-subunit)-specific serum  
60 IgG levels (B) and serum titers of 100% virus neutralization for SARS-CoV-2 wild type B-1 (VNT 100) (C)  
61 were analyzed in donors aged >80 years at the indicated time points after primary vaccination with BNT162b2.  
62  $n=35, 36, 34, 15$  donors were analyzed on W5, W24, W26, W40, respectively in (B);  $n=15$  donors on all time  
63 points in (C). Log<sub>2</sub> of the fold change in peak response values for spike (S1 subunit)- ( $n=33$ ) and RBD-specific  
64 ( $n=33$ ) IgG, neutralizing antibody titers ( $n=15$ ), and spike-specific T cell frequencies ( $n=32$ ) in participants after  
65 2<sup>nd</sup> and 3<sup>rd</sup> vaccination (D). Comparison of the median staining intensity (MSI) of interferon (IFN) $\gamma$  of spike-  
66 specific CD4 T cells of vaccinated participants determined at W3 ( $n=51$ ), W5 ( $n=51$ ), and W26 ( $n=33$ ), and of  
67 80 year old donors recovered from COVID-19 (not vaccinated,  $n=30$ , magenta) (E). Control stimulations of  
68 PBMC with staphylococcal enterotoxin B (figure S3) confirmed the stability of the T cell stimulation conditions  
69 over time. Each symbol represents data of one donor at one time point. Horizontal lines indicate median values  
70 of data points in each column, horizontal dotted lines indicate the cutoff for antibody positivity at 35.2 BAU/mL  
71 (B) and the lower detection limit for the VNT 100 assay at a reciprocal titer of 8 (C). p values were determined  
72 using the two-tailed Wilcoxon matched-pairs signed rank test throughout except when comparing vaccinated  
73 (W26) vs. recovered groups (two-tailed Mann-Whitney test). VNT, virus neutralization test; RBD, receptor  
74 binding domain; BAU, binding antibody units.

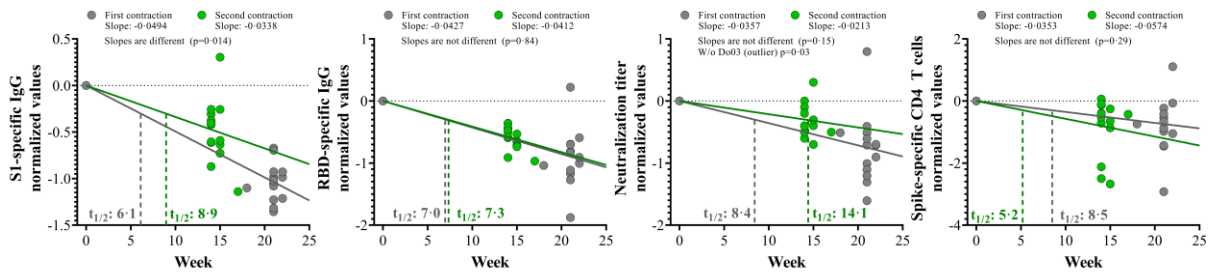

76

77 **Figure S2. Contraction of SARS-CoV-2 spike-specific CD4 T cell and humoral immunity after second and**  
 78 **third “booster” vaccination with BNT162b2.**

79 Normalized slopes of serum SARS-CoV-2 S1-specific IgG, RBD-specific IgG, neutralization titers, and  
 80 circulating SARS-CoV-2 spike-specific CD4 T cells, after the second dose (first contraction, grey dots) and after  
 81 the third dose (second contraction, green dots) of BNT162b2. Weeks indicated on the x axis are weeks after  
 82 respective peak responses. Slopes were calculated using a linear mixed effect model from log-transformed data  
 83 and regression lines are shown as solid lines. Data for each donor and each contraction was normalized to zero at  
 84 week five (first contraction) and week 26 (second contraction). The half-lives ( $t_{1/2}$ ) of each modality are shown as  
 85 dashed lines. The linear mixed effect models were calculated from 14 donors (neutralization titers, RBD- and S1-  
 86 specific IgG serum responses) and 13 donors (spike-specific CD4 T cell responses. RBD, receptor binding  
 87 domain.

88

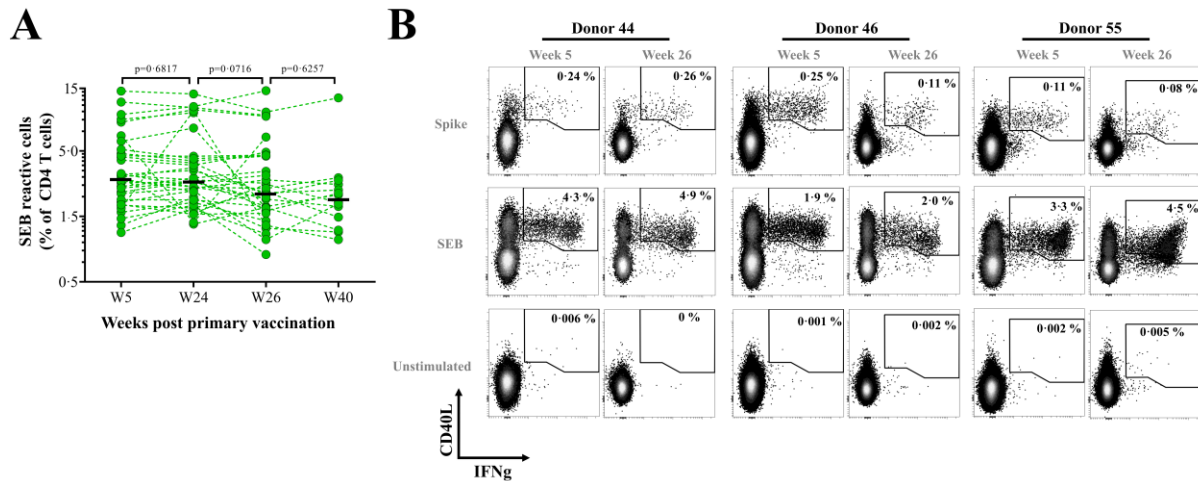

89  
90  
91  
92  
93  
94  
95  
96  
97  
98  
99  
100  
101

**Figure S3. Blood CD4 T cell response to SEB in >80 year-old vaccinated donors and examples of flow cytometric analysis.**

Blood was collected at the indicated time points post primary vaccination. Vaccinations with BNT162b2 were performed at week 0, week 3, and week 24 (figure 1A). Frequencies of CD40L+IFN $\gamma$ + CD4 T cells after culture of PBMC in the presence of the superantigen staphylococcal enterotoxin B (SEB) are shown (A).  $n=34, 35, 34, 14$  donors were analyzed on W5, W24, W26, W40, respectively.  $p$  values were determined by two-tailed Wilcoxon matched-pairs signed rank test. Representative analysis of flow cytometry data depicting the detection of CD40L+IFN $\gamma$ + CD4 T cells in three donors at week 5 and week 26 are shown in (B). PBMC were stimulated in the presence or absence of spike protein peptide pool or SEB. Data of CD4 T cells are shown; frequencies of gated cells are indicated.

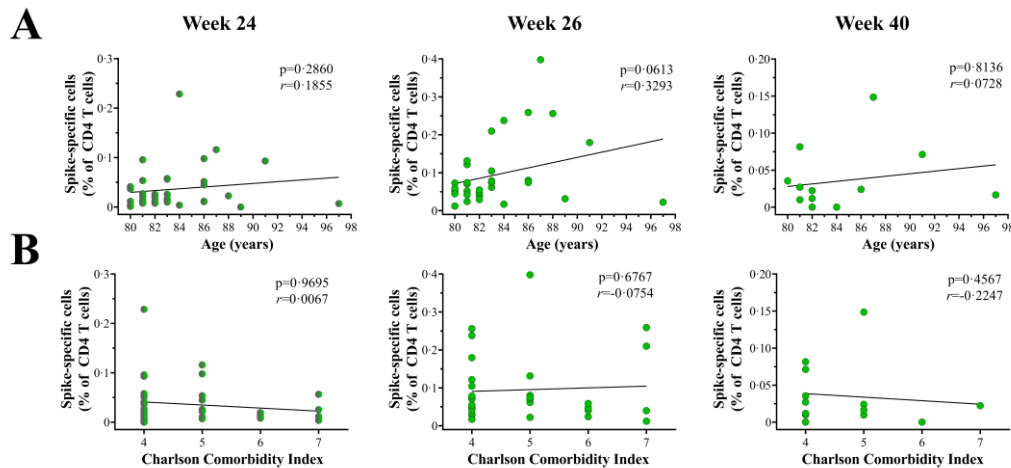

102  
103  
104  
105  
106  
107  
108  
109

**Figure S4. Lack of correlation between spike-specific CD4 T cell frequencies and age or comorbidities before and after a booster vaccination with BNT162b2.**

Results of the correlation analysis between the indicated frequencies of SARS-CoV-2 spike-specific CD4 T cells and the age (A) or the Charlson Comorbidity Index (CCI) (B) of individual donors before (W24,  $n=35$ ), two weeks later (W26,  $n=33$ ), and average 16 weeks (W40,  $n=13$ ) after a third “booster” BNT162b2 vaccination. Spearman's correlation test. Fitted linear regression lines are shown as black lines. Each dot represents one donor.



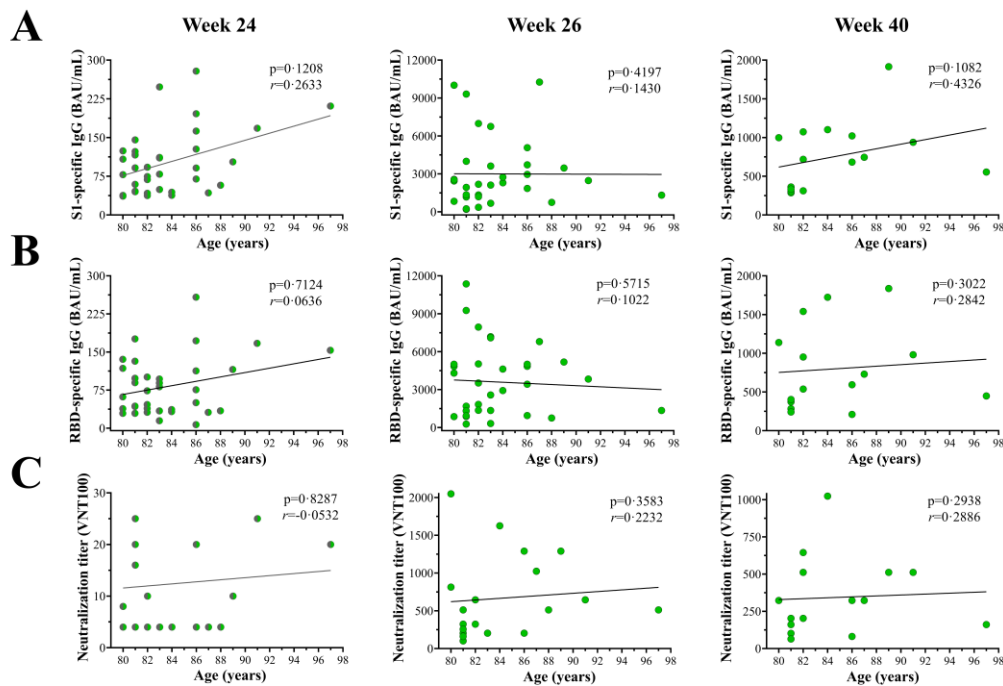

111

112 **Figure S5. Lack of correlation between humoral SARS-CoV-2 immunity and age before and after a**  
 113 **booster vaccination with BNT162b2.**

114 Results of the correlation analysis between serum SARS-CoV-2 S1-specific IgG (A), RBD-specific IgG (B), or  
 115 neutralization titer (C) and the age of individual donors before (W24), two weeks later (W26), and average 16  
 116 weeks (W40) after a third “booster” BNT162b2 vaccination.  $n=36$ , 34, 15 donors were analyzed on W24, W26,  
 117 W40, respectively (A);  $n=36$ , 33, 15 donors were analyzed on W24, W26, W40, respectively (B);  $n=19$ , 19, 15  
 118 donors were analyzed on W24, W26, W40, respectively (C). Spearman's correlation test. Fitted linear regression  
 119 lines are shown as black lines. Each dot represents one donor. RBD, receptor binding domain; BAU, binding  
 120 antibody units; VNT, virus neutralization test.

121

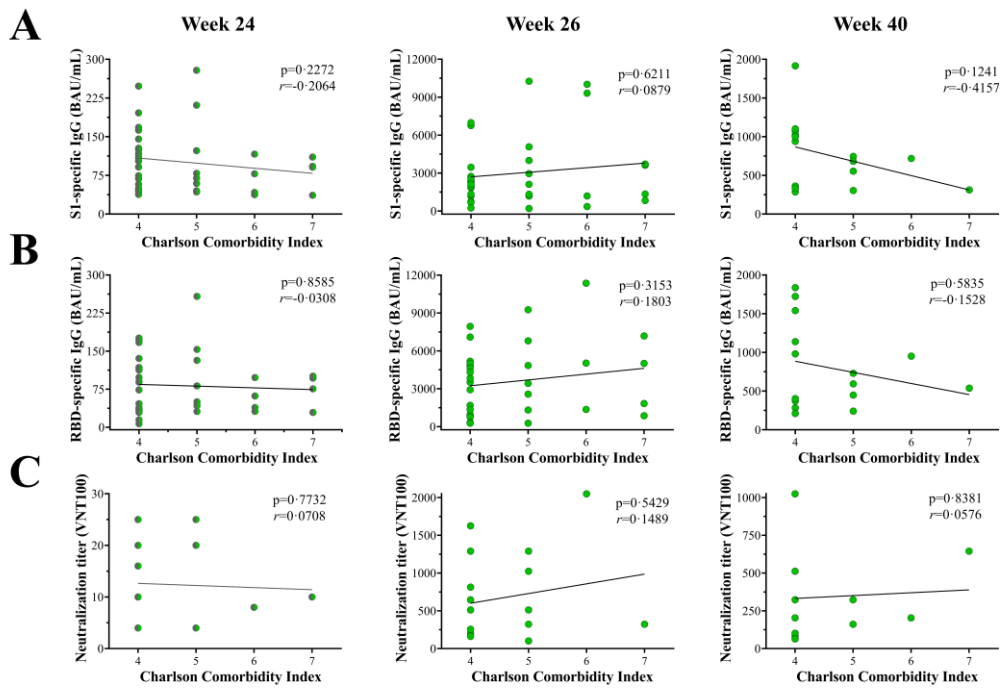

122

123 **Figure S6. Lack of correlation between humoral SARS-CoV-2 immunity and comorbidities before and**  
 124 **after a booster vaccination with BNT162b2.**

125 Results of the correlation analysis between serum SARS-CoV-2 S1-specific IgG (A), RBD-specific IgG (B), or  
 126 neutralization titer (C) and the Charlson Comorbidity Index (CCI) of individual donors before (W24), two  
 127 weeks later (W26), and average 16 weeks (W40) after a third “booster” BNT162b2 vaccination.  $n=36$ , 34, 15  
 128 donors were analyzed on W24, W26, W40, respectively (A);  $n=36$ , 33, 15 donors were analyzed on W24, W26,  
 129 W40, respectively (B);  $n=19$ , 19, 15 donors were analyzed on W24, W26, W40, respectively (C). Spearman's  
 130 correlation test. Fitted linear regression lines are shown as black lines. Each dot represents one donor. RBD,  
 131 receptor binding domain; BAU, binding antibody units; VNT, virus neutralization test.

132

## 133 **Material and Methods**

134

### 135 Study participants

136 Up to six blood samples were obtained from participants aged >80 years by venipuncture as shown in figure  
137 S1A. Samples were collected before first (week 0, W0), and three weeks (W3, right before 2<sup>nd</sup> vaccination), five  
138 weeks (W5), average 24 weeks (W24, before 3<sup>rd</sup> vaccination), average 26 weeks (W26), and 40 weeks (W40)  
139 after first vaccination by injection of Tozinameran (BNT162b2 vaccine, Comirnaty®) in the deltoid muscle, at a  
140 vaccination center in Marburg, Germany (Tables S1 and S2).

141

142 Analyses of vaccinated donors were performed between March 2021 and January 2022. In May 2021, blood  
143 samples were obtained by venipuncture from unvaccinated donors >80 years of age living in a retirement home,  
144 having recovered from COVID-19 after an outbreak with SARS-CoV-2 variant B.1.1.221 in January 2021. All  
145 donors provided informed consent to participate in the study. Few participants were later excluded from the  
146 study for reasons unrelated to the study (Table S2). Additionally, data of one donor was excluded from the  
147 whole T cell analysis due to strong erythrolysis (Polycythemia Vera) and data of one donor excluded on W40  
148 due to sample clogging during the T cell assay. Number of donors analyzed and depicted on the different weeks  
149 in figure 1, S1B-S1E, and S3A was selected based on matched-pair comparisons.

150 The study of patients with COVID-19 and vaccinations against COVID-19 was approved by the ethics  
151 committee of the medical faculty of the Philipps-University Marburg (study number 40/21-12032021).

152

153

### 154 Sample processing and clinical lab

155 Blood serum was isolated from Serum Separator Clot Activator tubes (Greiner Bio-One GmbH, Frickenhausen,  
156 Germany) according to the manufacturer's instructions, and stored frozen until analysis.

157 Peripheral blood mononuclear cells (PBMC) were isolated from fresh heparinized whole blood by density  
158 gradient centrifugation over Pancoll human (Pan Biotech, Aidenbach, Germany) after dilution with an equal  
159 volume of PBS at room temperature. PBMC were washed twice (500xg, 10 minutes, 4°C) in cold PBS  
160 supplemented with 0.2% BSA, counted manually, and resuspended in RPMI 1640 media (Gibco, Life  
161 Technologies, Carlsbad, CA) supplemented with penicillin, streptomycin, and 10% human AB serum (all  
162 Sigma, St. Louis, MO) at  $5 \times 10^6$  cells/mL.

163

164

### 165 Assessment of antigen-specific T cells (ART)

166 Antigen-reactive T cell responses were analyzed using a protocol based on previous work.<sup>1</sup> 500µL media  
167 containing  $5 \times 10^6$  PBMC were transferred into 12mL round-bottom tubes (Greiner Bio-One GmbH,  
168 Frickenhausen, Germany) and stimulated with either SARS-CoV-2 spike protein peptide mix (wildtype,  
169 Miltenyi Biotec), SEB (0.7µg/mL, kindly provided by Prof. Bernhard Fleischer, Bernhard Nocht Institute of  
170 Tropical Medicine, Hamburg, Germany), or with an equal volume of water as a control, in the presence of anti-  
171 CD28 (5µg/mL) and monensin (1µg/mL) for 12 hours under humid conditions in a 5% CO<sub>2</sub> atmosphere.  
172 Brefeldin A (1µg/mL) was added two hours after the start of the stimulation. The stimulation was stopped by

173 adding 2nM EDTA. PBMC were harvested, transferred to a new 15mL centrifuge tube, washed with 10mL  
174 PBS/0.2% BSA, and pelleted for ten minutes at 490xg, at 4°C. Dead cell labeling was performed by  
175 resuspending the cell pellet in 500µL PBS supplemented with 1:1000 amine-reactive Zombie Aqua™ Fixable  
176 Viability dye (Biolegend), incubated for 20 minutes in the dark at room temperature. PBS/0.2% BSA was added  
177 to quench the remaining reactive dye. After washing with 2mL PBS/0.2% BSA, and pelleting for ten min, at  
178 490xg, at 4°C, PBMC were fixed for 20 minutes using 2% formaldehyde solution (Thermo Scientific, Germany)  
179 in the dark and washed twice with 2mL PBS/0.2% BSA (10 minutes, 700xg, 4°C). Cell pellets were  
180 resuspended in 200µL PBS/0.2% BSA, transferred into a V-bottom-96 well plate (Sarstedt), and centrifuged  
181 (700xg, 5 minutes, 4°C). After discarding the supernatants, pellets were resuspended in 50µL Brilliant Violet  
182 Staining Buffer (Biolegend) supplemented with antibodies including anti-CD4-PECy7 (1:400 dilution) for the  
183 detection of CD4 T cells, anti-CD8-BV570 (1:100 dilution), and anti-CD19/123/33-BV510 (all from Biolegend  
184 at 1:50, 1:50, 1:400 dilution, respectively) for the exclusion of CD8 T cells, monocytes and other myeloid cells,  
185 B cells, basophils, and plasmacytoid dendritic cells, and incubated 30 minutes in the dark, at room temperature.  
186  
187 Afterwards, cells were washed once with 200µL PBS/0.2% BSA, and centrifuged (700xg, 5minutes, 4°C). Cell  
188 pellets were then washed twice in 200µL permeabilization buffer (diluted using Millipore water from 10x  
189 concentrated stock buffer, ThermoFisher, Waltham, MA), and finally resuspended in 50µL permeabilization  
190 buffer supplemented with antibodies targeting CD40L (1:100 dilution conjugated to BV421, Biolegend), and  
191 intracellular molecules including anti-IFNγ-R718 (1:100 dilution BD Biosciences, San Jose, CA), and incubated  
192 for 30 minutes at room temperature in the dark. Then, cells were washed once in 200µL permeabilization buffer,  
193 once in PBS/0.2% BSA, and stored at 4°C in PBS/0.2% BSA until acquisition on a MACSQuant 16 flow  
194 cytometer (Miltenyi Biotec, Bergisch Gladbach, Germany).

195  
196 FlowJo version 10 (BD, Ashland, OR) and OMIQ.ai (Santa Clara, CA) were used for analyzing flow cytometry  
197 data. Flow cytometry standard (FCS) files underwent quality control and, where applicable, anomaly removal by  
198 FlowAI,<sup>2</sup> and data of live CD4+ T lymphocytes were gated according to FSC and SSC parameters and their  
199 CD4<sup>+</sup>CD8<sup>-</sup>CD19<sup>-</sup>CD123<sup>-</sup>CD33<sup>-</sup>LD-Aqua<sup>low/-</sup> phenotype. Cell aggregates were removed by gating according to  
200 FSC-H/FSC-A and SSC-H/SSC-A parameters. Antigen-reactive CD4 T cells (ART) were defined as CD40L+  
201 IFNγ+ expressing cells after spike peptide stimulation, and their frequencies were determined among total CD4  
202 T cells.

203  
204 For background correction, frequencies of CD40L+IFNγ+ T cells among CD4 T cells from unstimulated control  
205 samples were subtracted from ART frequencies for each individual donor. Whenever this difference was equal  
206 to or below 0%, frequencies were set to 0.0001%, a value exceeded by all measurements in which ART were  
207 detectable, in order to allow the display of data on a logarithmic scale in figure 1.

#### 208 209 Quantification of SARS-CoV-2-specific antibodies

210 Serum IgG antibodies against the receptor-binding domain (RBD) of the SARS-CoV-2 spike protein were  
211 quantified using the automated SARS-CoV-2-IgG-II-Quant-Assay on the Abbott Alinity i analyzer (Abbott,  
212 Wiesbaden, Germany), following the manufacturer's protocol. Results obtained in arbitrary units/mL (AU/mL)

213 were converted into binding antibody units (BAU)/mL by multiplication with the factor 0.142, according to the  
214 manufacturer's instructions. Results in BAU/mL are calibrated against the "First WHO International Standard  
215 for anti-SARS-CoV-2 immunoglobulin (NIBSC code: 20/136)". The lower cutoff for this assay is at 7.1  
216 BAU/mL. Sera exceeding the detection range of the assay (40000 AU /mL) were automatically pre-diluted 1:2  
217 by the device and measured again.

218  
219 Serum IgG directed against the S1 subunit of the SARS-CoV-2 spike protein was quantified in BAU/mL using  
220 the Anti-SARS-CoV-2-QuantiVac ELISA (Euroimmun, Lübeck, Germany). Pipetting was performed on the  
221 automated EuroLab Workstation (Euroimmun), following the manufacturer's protocol. Primary data obtained in  
222 relative units per mL were converted into binding antibody units (BAU)/mL by multiplication with the factor  
223 3.2, according to the manufacturer's instructions. Results in BAU/mL are calibrated against the "First WHO  
224 International Standard for anti-SARS-CoV-2 immunoglobulin (NIBSC code: 20/136)". The lower cutoff for this  
225 assay is at 35.2 BAU/mL. Sera exceeding the detection range of the assay were manually pre-diluted 1:10  
226 and/or 1:50 and measured again.

227

228

#### 229 SARS-CoV-2 neutralization tests (VNT-100)

230 Human sera were heat-inactivated for 30 minutes at 56 °C and diluted in a two-fold dilution series in 96-well  
231 cell culture plates (1:4 to 1:512 for week 24 sera, 1:8 to 1:1024 for week 26 sera). One hundred plaque-forming  
232 units (PFU) of SARS-CoV-2 were added in the same volume to the serum dilutions. The German SARS-CoV-2  
233 virus isolate BavPat1/2020 (European Virus Archive Global #026 V-03883, Genbank: MZ558051.1) was used.  
234 The sequence of the viruses was confirmed. Following incubation at 37°C for one hour, approximately 20000  
235 Vero C1008 cells (ATCC, Cat. no. CRL-1586, RRID: CVCL\_0574) were added. Plates were then incubated at  
236 37°C in a 5% CO<sub>2</sub> atmosphere, and cytopathic effects were evaluated at day four post infection. Neutralization  
237 was defined as the absence of cytopathic effects in the serum dilutions. The reciprocal neutralization titer was  
238 calculated from the highest serum dilution without cytopathic effects as a geometric mean based on three  
239 replicates. The lower detection limit of the assay is 8 (reciprocal titer) for week 24 sera and 16 for week 26 sera,  
240 corresponding to the first dilution of the respective serum. Two positive controls were used as inter-assay  
241 neutralization standards and quality control for each test. Neutralization assays were performed in the BSL-4  
242 laboratory of the Institute of Virology at Philipps University Marburg, Germany.

243

244

#### 245 Statistical analysis details

246 Prism version 9 (GraphPad software, San Diego, CA) was used to display data, and perform descriptive  
247 statistics and significance testing. To determine differences between cohorts in figure 1F (vaccinated group W26  
248 vs recovered group), a two-tailed Mann-Whitney test was applied to calculate the p value. For assessing donor-  
249 specific responses over time, the two-tailed Wilcoxon matched-pairs signed-rank test was used. To identify  
250 changes in the immune contraction after the 2<sup>nd</sup> or 3<sup>rd</sup> vaccination we used an exponential decay model with a  
251 decay constant for each of the two contractions. Since the response to the contractions showed a pronounced  
252 donor- and contraction-specific effect, we also included a donor-effect. We modeled the logarithm of the signals

253 using a linear mixed effect model, including the donor, the contraction and the time (in weeks) as well as  
254 interactions between donor and contraction and contraction and time as predictors. In this way we account for  
255 the donor-specific effect at time point zero of each contraction, the decay constant for the first contractions and  
256 the interaction term for the second contraction and time. We calculated the decay constant of the second  
257 contraction by adding the decay constant for the first contraction and the interaction term for the second  
258 contraction and time. We tested whether the difference between the decay constant in the first and second  
259 contraction was significantly different from zero using a t-test for the interaction term for the second contraction  
260 and time. Data for each donor and each contraction was normalized to 1 for week 5 (first contraction) and week  
261 26 (second contraction), and donors selected to evaluate contractions (slopes) were those who participated also  
262 in W40 (14 donors, VNT, RBD and spike IgG serum responses; 13 donors, spike-specific CD4 T cell  
263 responses). All analysis have been performed in R (version 4.1.2).<sup>3</sup> Spearman's rank correlation analysis (two-  
264 tailed, 95% confidence interval) was employed in the correlation tests between cellular or humoral immune  
265 responses and age or CCI.

266  
267

#### 268 Acknowledgements

269 The authors wish to thank all participating donors and especially the vaccination center in Marburg,  
270 Germany, and its Chief Manager K. Oerder for excellent support throughout this study.

271  
272

#### 273 **Supplementary references**

- 274 1. Schulz AR, Malzer JN, Domingo C, et al. Low Thymic Activity and Dendritic Cell Numbers Are  
275 Associated with the Immune Response to Primary Viral Infection in Elderly Humans. *J Immunol*  
276 2015;195(10):4699-711. DOI: 10.4049/jimmunol.1500598.
- 277 2. Monaco G, Chen H, Poidinger M, Chen J, de Magalhaes JP, Larbi A. flowAI: automatic and interactive  
278 anomaly discerning tools for flow cytometry data. *Bioinformatics* 2016;32(16):2473-80. DOI:  
279 10.1093/bioinformatics/btw191.
- 280 3. R Core Team (2021). R: A language and environment for statistical computing. R Foundation for  
281 Statistical Computing, Vienna, Austria. URL <https://www.R-project.org/>.

282
